# Supplementary material for: Aortopathy in a Mouse Model of Marfan Syndrome Is Not Mediated by Altered Transforming Growth Factor β Signaling
Source: PubMed Central journal article supplement — J Am Heart Assoc. 2017 Jan 24;6(1):e004968. doi: 10.1161/JAHA.116.004968 (PMC5523644; doi:10.1161/jaha.116.004968), 2017-01-24
Supplement: JAH3-6-e004968-s001.pdf [file JAH3-6-e004968-s001.pdf]

# **SUPPLEMENTAL MATERIAL**

**Table S1. Primers used for qRT-PCR.**

| Target          | Forward primer (5' to 3') | Reverse primer (5' to 3') |
|-----------------|---------------------------|---------------------------|
| <i>Tgfb1</i>    | AAATTGCTCGACGCTGTTCT      | CAACCGATGGATCAGAAGGT      |
| <i>Tgfb3</i>    | CGGAGTACCTTCAACCCAAA      | CTCGAGCAGGTCGTATGTCA      |
| <i>Tgfb1</i>    | TGAGTGGCTGTCTTTTGACG      | AGCCCTGTATTCCGTCTCCT      |
| <i>Tgfb2</i>    | CGAGGAGTACTACGCCAAGG      | GCGGACGATTCTGAAGTAGG      |
| <i>Tgfb3</i>    | GATGAGCACATAGCCAAGCA      | TTTCCAGACCCAAGTTGGAC      |
| <i>Myh11</i>    | AGCCGAAAGACAGAGAACA       | CCAAAGCGAGAGGAGTTGTC      |
| <i>Tagln</i>    | GATGGAACAGGTGGCTCAAT      | TTCCATCGTTTTTGGTCACA      |
| <i>Smtn</i>     | TCAGAGGCTTCTCCAACACTAAGAG | TTGGCTCTCGATTTGGGGTTGGTTG |
| <i>Ctgf</i>     | AGCAGCTGGGAGAACTGTGT      | GCTGCTTTGGAAGGACTCAC      |
| <i>Lox</i>      | GGGAGTGGCACAGCTGTCA       | TCAGCCACTCTCCTCTGTGTGT    |
| <i>Lox1</i>     | TGTGCAGCCTGGGAACTACA      | TGGTGAAGTCAGACTCCAGAACA   |
| <i>Serpine1</i> | GGGCATGCCTGACATGTTTA      | TTGCAGTGCCTGTGCTACAGA     |
| <i>Mmp2</i>     | CCTGGACCCTGAAACCGTG       | TCCCCATCATGGATTTCGAGAA    |
| <i>Mmp9</i>     | GCGTCGTGATCCCCACTTAC      | CAGGCCGAATAGGAGCGTC       |
| <i>Mmp12</i>    | TGGTACTAGCCCATGCTTT       | AGTCCACGTTTCTGCCTCATC     |
| <i>Eln</i>      | GCGTCTTGCTGATCCTCTTG      | GGGAACTCCACCAGGAAGTC      |
| <i>Fbn1</i>     | AAGGGTACATCGGCACTCAC      | CGTTGAGACAGCCACTTTCA      |
| <i>18S</i>      | GGCGTCCCCCAACTTCTTA       | GGGCATCACAGACCTGTTATTG    |

## Supplemental Figure Legends:

**Figure S1.** Pathologic sequelae of knockdown of TBR11 in aortic SMC of MFS mice.

Representative images of sections of ascending aortas of 16-week-old mice, 10 weeks after treatment with tamoxifen: **A, C, E**, sections from aortas of *Acta2-Cre<sup>0/0</sup> Fbn1<sup>+/+</sup>* mice (WT). **B, D, F**, sections from aortas of *Acta2-Cre<sup>+0</sup> Fbn1<sup>C1039G/+</sup>* mice (MFS-TBR11<sup>-/-</sup>). All mice were *Tgfb2<sup>flox/flox</sup>*. Sections were chosen to illustrate specific pathologic features, not to provide a formal comparison among the 3 groups in this experiment. For a formal comparison of all 3 groups of experimental mice (WT, MFS-TBR11<sup>+/+</sup>, and MFS-TBR11<sup>-/-</sup>), see Table 1. **B**, Arrow: penetrating aortic ulcer. **D**, Arrowheads: aortic intramural hematomas. **F**, arrowheads: Prussian blue stain. Dashed line indicates the boundary between media and adventitia. **A–F**, scale bars: 100  $\mu$ m. **A–D**, Hematoxylin and eosin stain; **E–F**, Prussian blue stain with eosin counterstain. MFS = Marfan syndrome; TBR11 = type II TGF- $\beta$  receptor.

**Figure S2.** Abnormal elastic laminae in 16-week-old MFS and MFS-TBR11<sup>-/-</sup> mice. Representative images of sections of ascending aortas, 10 weeks after treatment with tamoxifen (**A, B**, and **D**) or vehicle (**C**). Hematoxylin and eosin-stained sections were illuminated with fluorescein wavelengths. Sections are from: **A**, an *Acta2-Cre<sup>0/0</sup> Fbn1<sup>+/+</sup>* mouse (WT); **B**, an *Acta2-Cre<sup>0/0</sup> Fbn1<sup>C1039G/+</sup>* mouse [MFS (T)]; **C**, an *Acta2-Cre<sup>+0</sup> Fbn1<sup>C1039G/+</sup>* mouse [MFS (V)]; or **D**, an *Acta2-Cre<sup>+0</sup> Fbn1<sup>C1039G/+</sup>* mouse (MFS-TBR11<sup>-/-</sup>). All mice were *Tgfb2<sup>flox/flox</sup>*. Arrows: elastin breaks. **A – D**, scale bars: 100  $\mu$ m. MFS = Marfan syndrome; (T) = tamoxifen; (V) = vehicle; TBR11 = type II TGF- $\beta$  receptor.

**Figure S3.** 16-week-old MFS mice develop aortic medial degeneration that is worsened by loss of SMC TBR11. **A–D**, images of representative sections of ascending aortas of 16-week-old mice, 10 weeks after treatment with tamoxifen or vehicle. Hematoxylin and eosin-stained sections were illuminated with fluorescein wavelengths. Sections are from: **A**, an *Acta2-Cre<sup>0/0</sup> Fbn1<sup>+/+</sup>* mouse (WT), **B**, a *Acta2-Cre<sup>0/0</sup> Fbn1<sup>C1039G/+</sup>* mouse [MFS (T)]; **C**, an *Acta2-Cre<sup>+0</sup> Fbn1<sup>C1039G/+</sup>* mouse that

received vehicle [MFS (V)]; and **D**, an *Acta2-Cre<sup>+/-</sup> Fbn1<sup>C1039G/+</sup>* mouse (MFS-TBRII<sup>-/-</sup>). All mice were *Tgfb2<sup>flox/flox</sup>*. Boxed areas in **A**, **B**, **C**, and **D** are enlarged in **E**, **F**, **G**, **H**, and **I**, with corresponding colored frames. **F**, **G**, arrows: moderate elastin damage; **H**, **I**, arrowheads: severe media damage leaving 0–1 elastic laminae intact. Scale bars: 100  $\mu$ m. MFS = Marfan syndrome; (T) = tamoxifen; (V) = vehicle; TBRII = type II TGF- $\beta$  receptor.

**Figure S4.** 8-week-old MFS mice do not have alterations in 3 TGF- $\beta$  signaling pathways in the ascending aortic media. Protein was extracted from aortic media of 8-week-old *Acta2-Cre<sup>0/0</sup> Fbn1<sup>+/+</sup>* mice (WT) or *Acta2-Cre<sup>0/0</sup> Fbn1<sup>C1039G/+</sup>* mice (MFS). All mice were *Tgfb2<sup>flox/flox</sup>* and were not injected either with tamoxifen or vehicle. **A**, Western blots were probed with antibodies to phospho-SMAD2, SMAD2, phospho-P38, P38, phospho-ERK1/2, ERK1/2, or  $\beta$ -actin. Each lane is from a single mouse. **B**, Densitometry of western blots shown in **A**. Levels of phosphorylated signaling proteins were normalized to the corresponding unphosphorylated proteins in the same samples. Data are from 3 mice per group; all are shown in **A**. Data are mean  $\pm$  SEM;  $P > 0.3$  for all three; unpaired t tests. MFS = Marfan syndrome; AU = arbitrary units.

WT

MFS-TBRII<sup>-/-</sup>

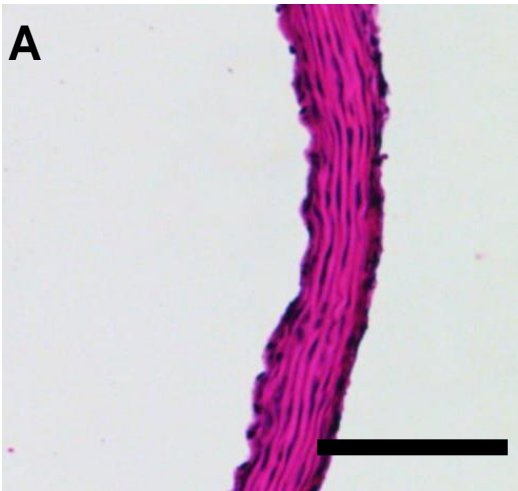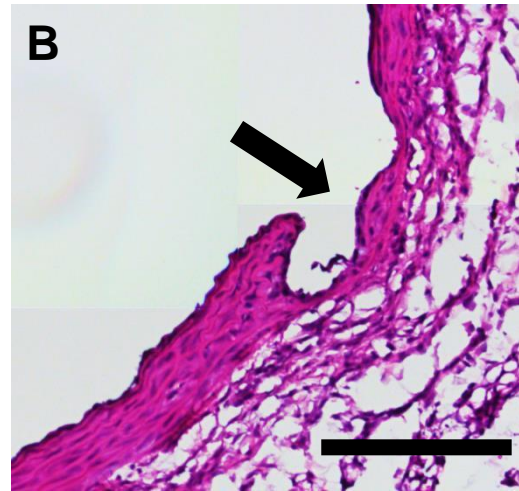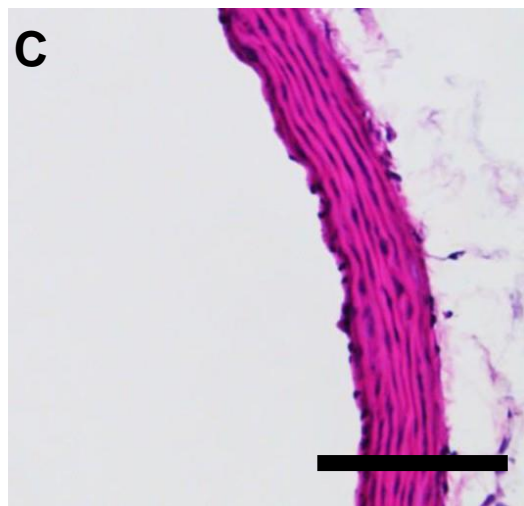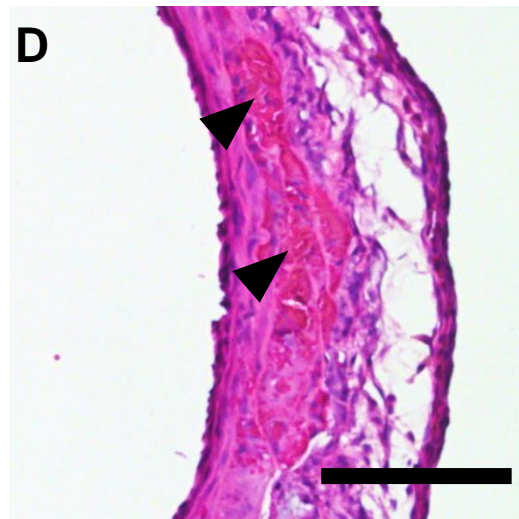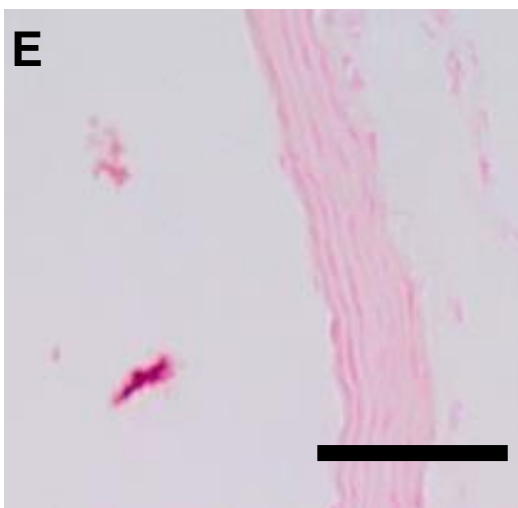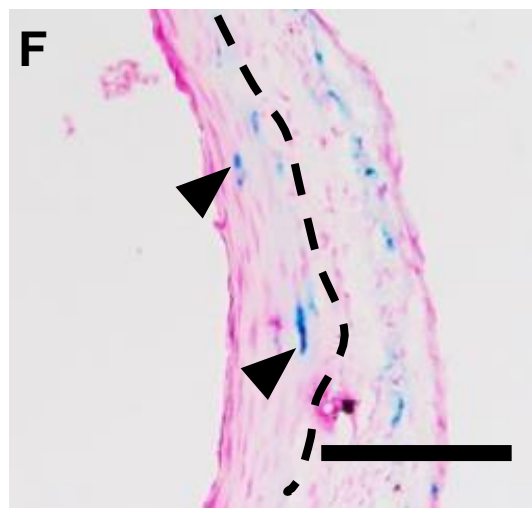

**Figure  
S1**

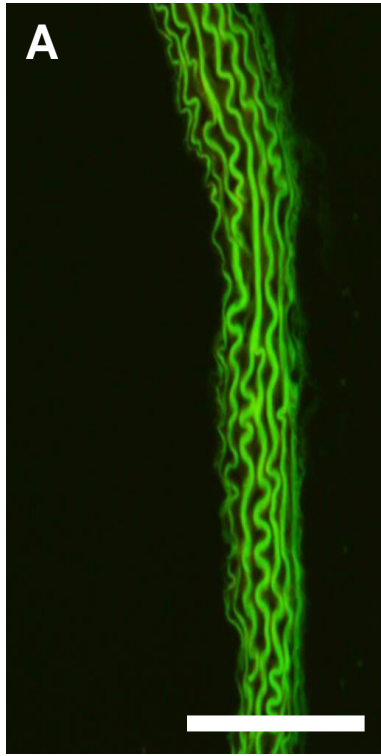

**WT**

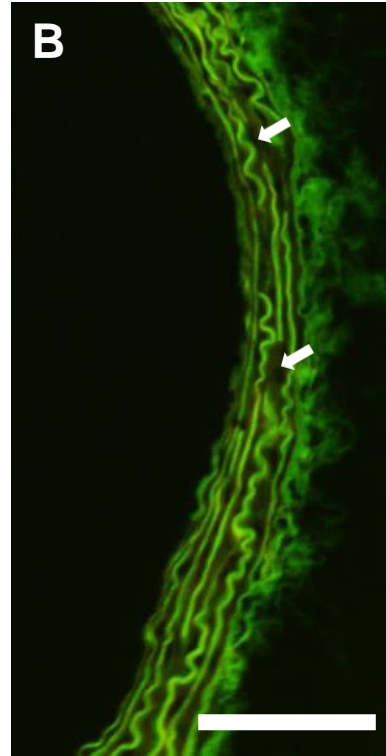

**MFS(T)**

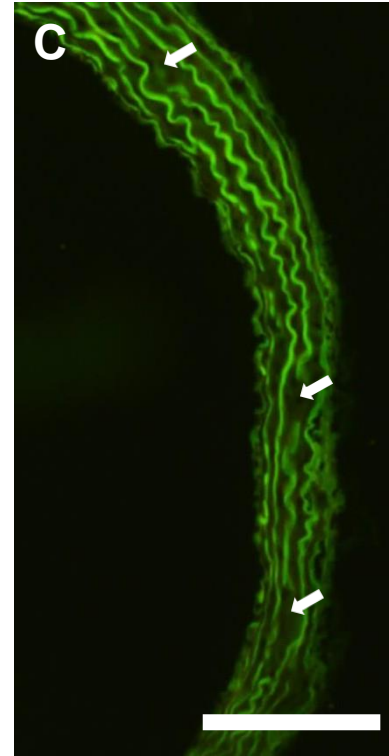

**MFS(V)**

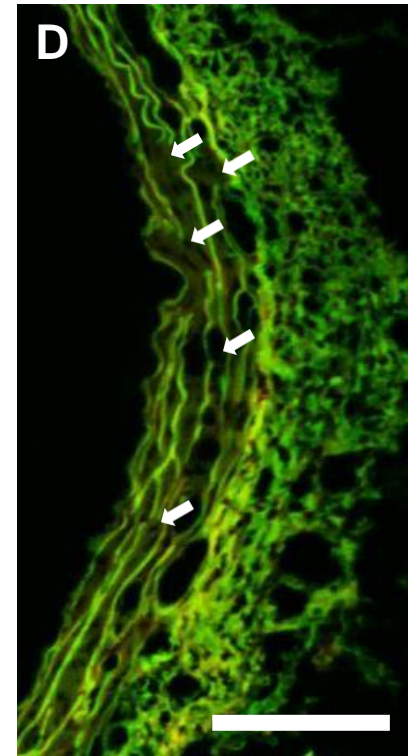

**MFS-TBR11<sup>-/-</sup>**

**Figure  
S2**

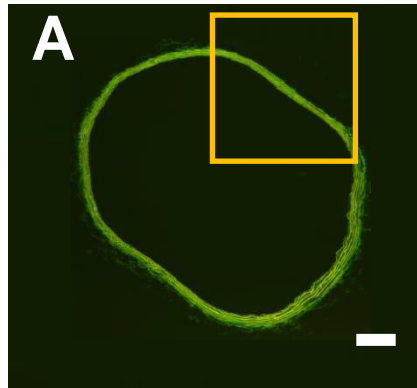

WT

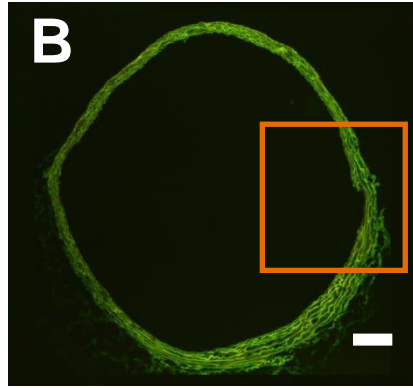

MFS(T)

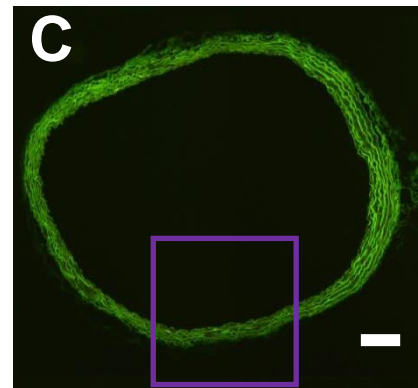

MFS(V)

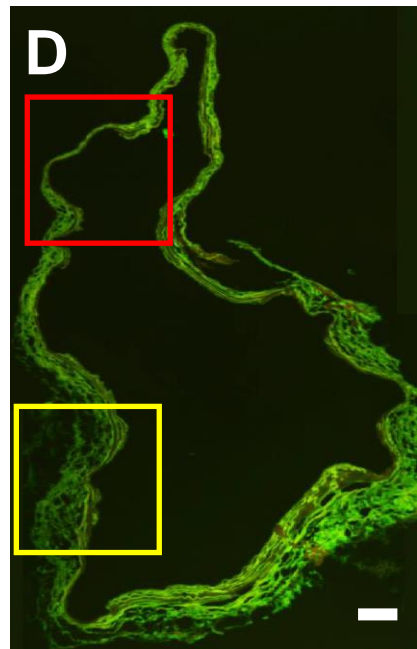

MFS-TBR11<sup>-/-</sup>

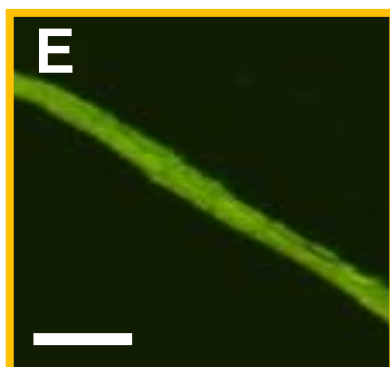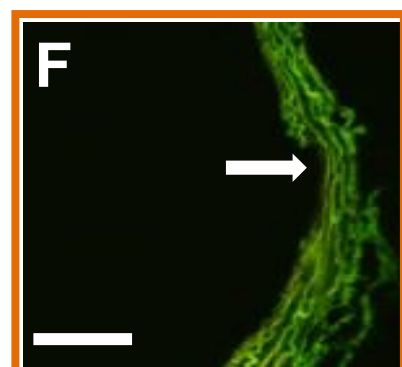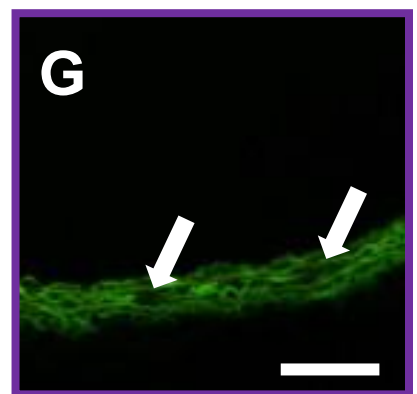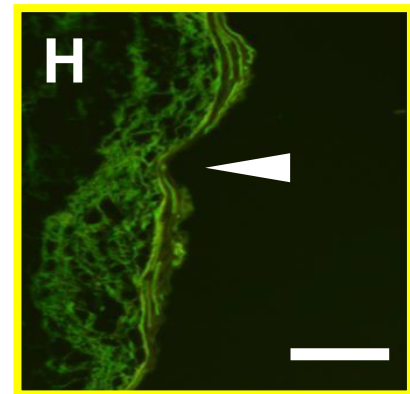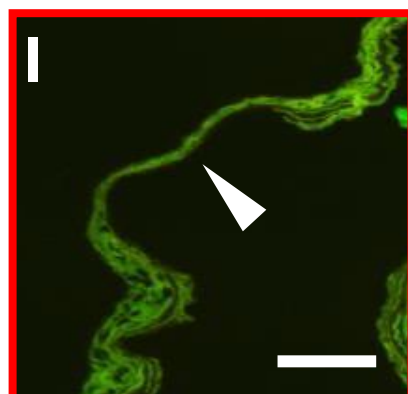

Figure  
S3

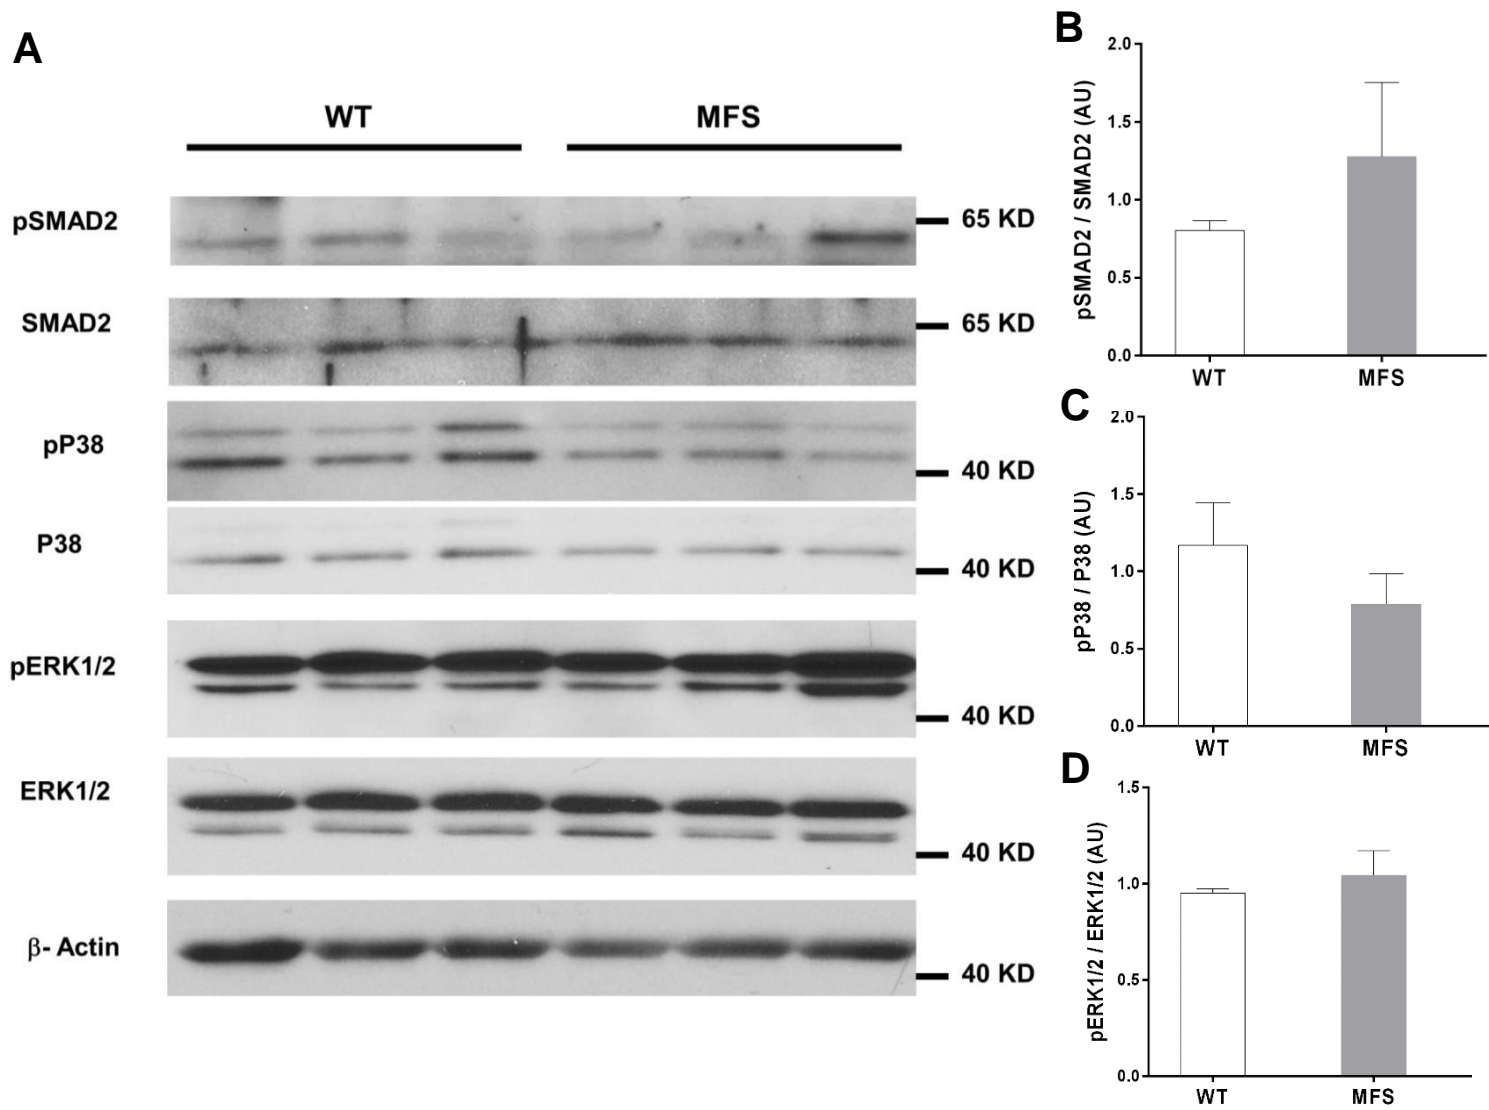

**Figure  
S4**
